# Supplementary material
Source: HighWire-hosted journal article supplement (https://gpsych.bmj.com/content/36/2/e101003)
Supplement: inline-supplementary-material-1 [file inline-supplementary-material-1.pdf]

**Supplementary Table 1. The demographic information and biochemical parameters.** AST: aspartate aminotransferase; LDH: lactic dehydrogenase; CK: Creatine Kinase;  $\alpha$ -HBDH:  $\alpha$ -Hydroxybutyrate dehydrogenase; HCY: Homocysteine; FA: folic acid; B12: Serum Vitamin B12; MCV: mean corpuscular volume.

|                     | Baseline: Mean (SD) (n=430) | Normal range   |
|---------------------|-----------------------------|----------------|
| Age                 | 23.90(2.765)                | /              |
| Years of abuse      | 2.23 (0.635)                | /              |
| Dosage(ml/day)      | 1796.88(453.915)            | /              |
| Craving             | 54.02(19.930)               | /              |
| Sleep               | 12.99(4.637)                | /              |
| Anxiety             | 45.49(10.750)               | /              |
| Depression          | 27.76(12.538)               | /              |
| AST(U/L)            | 44.04(17.337)               | 15~40U/L       |
| LDH(U/L)            | 246.77(79.96)               | 109~245U/L     |
| CK(U/L)             | 237.45(172.005)             | 18~198U/L      |
| $\alpha$ -HBDH(U/L) | 165.15(62.512)              | 72~182U/L      |
| HCY( $\mu$ mol/L)   | 21.26(6.242)                | <6 $\mu$ mol/L |
| FA (nmol/L)         | 24.88(8.907)                | 4.5-34.0nmol/L |
| B12(pg/ml)          | 801.69(223.407)             | >150pg/ml      |
| MCV (fl)            | 102.30(3.169)               | 86~100fl       |

**Supplementary Table 2.** Difference between relapsed individuals and non-relapsed individuals at baseline, according to their relapse status at the third month. Bonferroni corrected. AST: aspartate aminotransferase; LDH: lactic dehydrogenase; CK: Creatine Kinase;  $\alpha$ -HBDH:  $\alpha$ -Hydroxybutyrate dehydrogenase; HCY: Homocysteine; FA: folic acid; B12: Serum Vitamin B12; MCV: mean corpuscular volume

|                           | Relapsed individuals<br>(N=237) | Non-relapsed individuals<br>(N=193) | Statistics     |     |       |
|---------------------------|---------------------------------|-------------------------------------|----------------|-----|-------|
|                           | Mean (SD)                       | Mean (SD)                           | t              | df  | p     |
| Age                       | 23.93 (2.85)                    | 23.90 (2.64)                        | 0.115          | 428 | .908  |
| Years of abuse            | 2.23 (0.65)                     | 2.26(.64)                           | -0.465         | 428 | .642  |
| Onset Age                 | 19.61(2.52)                     | 19.779 (2.69)                       | -0.613         | 428 | .540  |
| Number of siblings        | 0.119 (0.38)                    | 0.093(0.31)                         | 0.793          | 428 | .428  |
| Daily dosage (ml)         | 1817.72(454.39)                 | 1775.75(466.14)                     | 0.942          | 428 | .347  |
|                           | N                               | N                                   | X <sup>2</sup> | df  | p     |
| <b>Education</b>          |                                 |                                     |                |     |       |
| Middle                    | 5                               | 4                                   | 0.386          | 3   | 0.943 |
| High                      | 46                              | 41                                  |                |     |       |
| College                   | 154                             | 120                                 |                |     |       |
| Master                    | 32                              | 28                                  |                |     |       |
| <b>Daily usage period</b> |                                 |                                     |                |     |       |
| Morning                   | 176                             | 227                                 |                |     |       |
| Noon                      | 7                               | 10                                  | 1.665          | 2   | 0.435 |
| Night                     | 10                              | 10                                  |                |     |       |
| <b>Situation of use</b>   |                                 |                                     |                |     |       |
| Home                      | 14                              | 15                                  |                |     |       |
| Rental                    | 81                              | 58                                  |                |     |       |
| Car                       | 33                              | 25                                  | 8.976          | 5   | 0.110 |
| Hotel                     | 49                              | 52                                  |                |     |       |
| Internet café             | 38                              | 17                                  |                |     |       |
| bar                       | 22                              | 26                                  |                |     |       |
| <b>Nationality</b>        |                                 |                                     |                |     |       |
| Chinese Korean            | 3                               | 0                                   |                |     |       |
| Han                       | 221                             | 190                                 |                |     |       |
| Hui                       | 4                               | 1                                   | 7.312          | 4   | 0.120 |
| Manchu                    | 8                               | 2                                   |                |     |       |
| Mongol                    | 1                               | 0                                   |                |     |       |

|                                             |                  |                  |          |           |          |  |
|---------------------------------------------|------------------|------------------|----------|-----------|----------|--|
| <b>Residence</b>                            |                  |                  |          |           |          |  |
| South of China                              | 71               | 58               | 0.816    | 2         | 0.665    |  |
| North of China                              | 165              | 135              |          |           |          |  |
| <b>Family guardian</b>                      |                  |                  |          |           |          |  |
| Father                                      | 26               | 31               |          |           |          |  |
| Mother                                      | 61               | 49               | 2.477    | 2         | 0.290    |  |
| Grandparents                                | 150              | 113              |          |           |          |  |
| <b>Parental marriage</b>                    |                  |                  |          |           |          |  |
| Normal                                      | 26               | 14               |          |           |          |  |
| Separate                                    | 67               | 50               |          |           |          |  |
| Divorce                                     | 101              | 80               | 4.774    | 4         | 0.311    |  |
| Remarry                                     | 39               | 46               |          |           |          |  |
| Other                                       | 4                | 3                |          |           |          |  |
| <b>Income(monthly)</b>                      |                  |                  |          |           |          |  |
| <10000                                      | 38               | 28               | 1.313    | 3         | 0.726    |  |
| 10000-20000                                 | 70               | 56               |          |           |          |  |
| 20000-30000                                 | 102              | 80               |          |           |          |  |
| >30000                                      | 27               | 29               |          |           |          |  |
| <b>Sources of first use</b>                 |                  |                  |          |           |          |  |
| Friends                                     | 114              | 95               |          |           |          |  |
| Schoolmate                                  | 66               | 55               | 0.187    | 2         | 0.911    |  |
| bar                                         | 57               | 43               |          |           |          |  |
| <b>Number of Friends use N<sub>2</sub>O</b> |                  |                  |          |           |          |  |
| 0                                           | 16               | 21               |          |           |          |  |
| 1                                           | 40               | 30               |          |           |          |  |
| 2                                           | 60               | 56               | 3.696    | 3         | 0.296    |  |
| >3                                          | 121              | 86               |          |           |          |  |
| <b>Smoking</b>                              | 203              | 173              | 1.537    | 1         | 0.215    |  |
| <b>Alcohol use</b>                          | 80               | 64               | 0.017    | 1         | 0.897    |  |
| <b>Alcohol use frequency</b>                |                  |                  |          |           |          |  |
| 1-3                                         | 20               | 15               |          |           |          |  |
| 3-5                                         | 19               | 24               |          |           |          |  |
| 5-10                                        | 22               | 12               | 3.639    | 4         | 0.457    |  |
| >10                                         | 19               | 13               |          |           |          |  |
| <b>Baseline</b>                             | <b>Mean (SD)</b> | <b>Mean (SD)</b> | <b>t</b> | <b>df</b> | <b>p</b> |  |
| AST                                         | 43.99(17.76)     | 44.31(16.88)     | -0.189   | 428       | 0.850    |  |
| LDH                                         | 251.51(90.06)    | 248.90(69.29)    | 0.331    | 428       | 0.741    |  |
| CK                                          | 242.65(201.98)   | 235.24(118.28)   | 0.451    | 428       | 0.652    |  |
| $\alpha$ -HBDH                              | 165.42(68.84)    | 168.25(51.82)    | -0.486   | 425.48    | 0.627    |  |
| HCY                                         | 21.17(6.39)      | 21.36(6.39)      | -0.310   | 428       | 0.757    |  |
| FA                                          | 24.04(9.41)      | 26.89 (7.49)     | -3.410   | 428       | 0.001    |  |
| B12                                         | 792.68(216.86)   | 813.92 (230.54)  | -0.982   | 428       | 0.327    |  |
| MCV                                         | 102.61(2.97)     | 101.95(3.42)     | 2.117    | 428       | 0.035    |  |
| Anxiety score                               | 46.96 (11.40)    | 42.76(9.51)      | 4.091    | 428       | <.0001   |  |
| Depression score                            | 26.89(11.47)     | 29.56 (13.77)    | -2.194   | 428       | 0.029    |  |
| Sleep score                                 | 12.99(4.40)      | 12.88(4.73)      | 0.263    | 428       | 0.793    |  |
| Craving score                               | 55.55 (20.64)    | 52.67(18.71)     | 1.498    | 428       | 0.135    |  |
